# Supplementary material for: Multiple Salivary Proteins from Aedes aegypti Mosquito Bind to the Zika Virus Envelope Protein
Source: MDPI journal article supplement (doi:10.3390/v14020221), 2022-01-24
Supplement: s1 [file s1]

## Supplementary Information

**Table S1:** *Aedes aegypti* salivary proteins selected for cloning and expression in HEK293E cells.

| Vector base | Type of protein                                                        | Protein size (Daltons) |
|-------------|------------------------------------------------------------------------|------------------------|
| AAEL000793  | antigen 5 AAEL000793-PA [ <i>Aedes aegypti</i> ]                       | 31897.04               |
| AAEL008766  | proline rich salivary secreted peptide [ <i>Aedes aegypti</i> ]        | 21117.95               |
| AAEL002704  | salivary anti FXa serpin [ <i>Aedes aegypti</i> ]                      | 50903.6                |
| AAEL007420  | Fxa-directed anticlotting serpin-like protein [ <i>Aedes aegypti</i> ] | 50392.91               |
| AAEL000533  | putative C-type lectin [ <i>Aedes aegypti</i> ]                        | 20676.06               |
| AAEL006347  | 2105426A apyrase                                                       | 65730.01               |
| AAEL006485  | AAEL006485-PA purine hydrolase [ <i>Aedes aegypti</i> ]                | 40935.67               |
| AAEL007394  | short salivary D7 protein [ <i>Aedes aegypti</i> ]                     | 21567.35               |
| AAEL003057  | AAEL003057-PB [ <i>Aedes aegypti</i> ]                                 | 32656.47               |
| AAEL003107  | AAEL003107-PA [ <i>Aedes aegypti</i> ]                                 | 41607.56               |
| AAEL003182  | AAEL003182-PA [ <i>Aedes aegypti</i> ]                                 | 50039.05               |
| AAEL003601  | AAEL003601-PA [ <i>Aedes aegypti</i> ]                                 | 39193.4                |
| AAEL000726  | putative secreted protein angiopoietin [ <i>Aedes aegypti</i> ]        | 36719.89               |
| AAEL006406  | putative 16.9 kDa secreted protein D7 [ <i>Aedes aegypti</i> ]         | 19939.63               |
| AAEL024303  | putative 18.2 kDa secreted protein [ <i>Aedes aegypti</i> ]            | 21163.03               |
| AAEL024303  | short D7 protein [ <i>Aedes aegypti</i> ]                              | 21248.11               |
| AAEL022638  | putative 14.5 kDa salivary protein [ <i>Aedes aegypti</i> ]            | 20050.05               |
| AAEL010235  | 30 kDa salivary gland allergen variant 2 [ <i>Aedes aegypti</i> ]      | 29154.89               |
| AAEL006424  | 37 kDa salivary gland allergen Aed                                     | 36895.1                |
| AAEL006417  | 37 kDa salivary gland allergen Aed 2                                   | 38627.77               |
